# Supplementary material
Source: publisher figshare collection journal article supplement (https://acs.figshare.com/ndownloader/files/4690042)
Supplement: Supplementary file 1 [file 4690042]

# “Supporting Information”

Title: **Design of Non-competitive Interleukin-8 Inhibitors Acting on CXCR1 and CXCR2**

*Alessio Moriconi,† Maria Candida Cesta,† Maria Neve Cervellera,† Andrea Aramini,† Silvia Coniglio,† Sandro Colagioia,† Andrea Rosario Beccari,† Cinzia Bizzarri,† Michela Rita Cavicchia,† Massimo Locati,‡,§ Emanuela Galliera,‡ Paola Di Benedetto,† Paolo Vigilante,† Riccardo Bertini† and Marcello Allegretti†**

Table of Contents:

Elemental Analyses of Listed Compounds

13C-NMR Data for Representative Compounds

**Appendix**

# Elemental Analyses of listed compounds

| **Compound** | **Molecular Formula** | **Anal. Calculated** | **Anal. Found** |
| --- | --- | --- | --- |
| 2-{4[(2-Methylprop-1-enyl]phenyl}propanoic acid  **(4)** | C13H16O2 | C, 76.44  H, 7.90 | C, 76.64  H, 7.85 |
| 2-[4-(Cyclohexylphenyl)propanoic acid  **(5)** | C15H20O2 | C, 77.55  H, 8.68 | C, 77.90  H, 8.75 |
| 2-[4-(Cyclopropylmethyl)phenyl]propanoic acid  **(8)** | C13H16O2 | C, 76.44  H, 7.90 | C, 77.00  H, 7.65 |
| 2-[4-(Cyclobutylmethyl)phenyl]propanoic acid  **(9)** | C14H18O2 | C, 77.03  H, 8.31 | C, 76.82  H, 8.65 |
| 2-[4-(Cyclopentylmethyl)phenyl]propanoic acid  **(10)** | C15H20O2 | C, 77.55  H, 8.68 | C, 77.90  H, 8.86 |
| 2-[3-(2-Phenylpropyl)phenyl]propanoic acid  **(20)** | C18H20O2 | C, 80.56  H, 7.51 | C, 80.50  H, 7.78 |
| 2-(3-Propionylphenyl)propanoic acid  **(23)** | C14H14O3 | C, 69.88  H, 6.84 | C, 70.15  H, 6.80 |
| 2-(3-Isobutyrylphenyl)propanoic acid  **(24)** | C13H16O3 | C, 70.89  H, 7.32 | C, 70.54  H, 7.48 |
| 2-[3-(Cyclopentylcarbonyl)phenyl]propanoic acid  **(25)** | C15H18O3 | C, 73.15  H, 7.37 | C, 73.38  H, 7.40 |
| 2-[3-(Cyclohexylcarbonyl)phenyl]propanoic acid  **(26)** | C16H20O3 | C, 73.82  H, 7.74 | C, 74.10  H, 7.68 |
| 2-[3-(Thien-2-ylcarbonyl)phenyl]propanoic acid  **(27)** | C14H12O3S | C, 64.60  H, 4.65  S, 12.32 | C, 64.30  H, 4.60  S, 12.14 |
| 2-[3-(2-Furoyl)phenyl]propanoic acid  **(28)** | C14H12O4 | C, 68.85  H, 4.95 | C, 68.80  H, 4.60 |
| 2-[3-(1,3-Oxazol-2-ylcarbonyl)phenyl]propanoic acid **(29)** | C13H11NO4 | C, 63.67  H, 4.52  N, 5.71 | C, 64.00  H, 4.40  N, 5.50 |
| 2-[3-(1,3-Thiazol-2-ylcarbonyl)phenyl]propanoic acid **(30)** | C13H11NO3S | C, 59.76  H, 4.24  N, 5.36  S, 12.27 | C, 59.66  H, 4.20  N, 5.66  S, 12.00 |
| 2-[3-(1-Phenylvinyl)phenyl]propanoic acid  **(31)** | C17H16O2 | C, 80.93  H, 6.39 | C, 80.65  H, 6.65 |
| 2-[3-(1-Phenethylethyl)phenyl]propanoic acid  **(35)** | C17H18O2 | C, 80.28  H, 7.13 | C, 80.58  H, 7.33 |
| 2-[3-(1-Hydroxy-1-phenethylethyl)phenyl]propanoic acid  (**36)** | C17H18O3 | C, 75.53  H, 6.71 | C, 75.73  H, 6.74 |
| 2-[3-(Phenylsulfonyl)phenyl]propanoic acid  **(37)** | C15H14O4S | C, 62.05  H, 4.86  S, 11.04 | C, 62.38  H, 4.99  S, 10.84 |
| 2-[4-(Benzoyloxy)phenyl]propanoic acid  **(39)** | C16H14O4 | C, 71.10  H, 5.22 | C, 71.43  H, 5.54 |
| 2-[4-(Propionyloxy)phenyl]propanoic acid  **(40)** | C12H14O4 | C, 64.85  H, 6.35 | C, 64.54  H, 6.05 |
| 2-[4-(Benzoylamino)phenyl]propanoic acid  **(41)** | C16H15NO3 | C, 71.36  H, 5.61  N, 5.20 | C, 71.68  H, 5.60  N, 5.55 |
| 2-[4-(2-Oxopyrrolidin-1-yl)phenyl]propanoic acid  **(43)** | C13H15NO3 | C, 66.94  H, 6.48  N, 6.00 | C, 67.29  H, 6.40  N, 6.15 |
| 2-{4-[(Methylsulfonyl)amino]phenyl}propanoic acid **(44)** | C10H13NO4S | C, 49.37  H, 5.39  N, 5.76  S, 13.18 | C, 49.17  H, 5.75  N, 5.70  S, 13.35 |
| 2-{4-[(Isopropylsulfonyl)amino]phenyl}propanoic acid **(45)** | C12H17NO4S | C, 53.12  H, 6.32  N, 5.16  S, 11.82 | C, 53.10  H, 6.20  N, 5.20  S, 11.57 |
| 2-{4-[(Phenylsulfonyl)amino]phenyl}propanoic acid **(46)** | C15H15NO4S | C, 59.00  H, 4.95  N, 4.59  S, 10.50 | C, 59.40  H, 4.90  N, 4.71  S, 10.25 |
| 2-(4-{[(2-Ethylphenyl)sulfonyl]amino}phenyl)propanoic acid **(47)** | C17H19NO4S | C, 61.24  H, 5.74  N, 4.20  S, 9.62 | C, 61.60  H, 5.90  N, 4.28  S, 9.67 |
| 2-(4-{[(4-Methylphenyl)sulfonyl]amino}phenyl)propanoic acid **(48)** | C16H17NO4S | C, 60.17  H, 5.37  N, 4.39  S, 10.04 | C, 59.23  H, 5.30  N, 4.75  S, 10.02 |
| 2-(4-{[(2-Chlorophenyl)sulfonyl]amino}phenyl)propanoic acid **(49)** | C15H14ClNO4S | C, 53.02  H, 4.15  N, 4.12  S, 9.44 | C, 53.40  H, 4.50  N, 4.00  S, 9.24 |
| 2-(4-{[(Trifluoromethyl)sulfonyl]amino}phenyl)propanoic acid  **(50)** | C10H10F3NO4S | C, 40.41  H, 3.39  N, 4.71  S, 10.79 | C, 40.45  H, 3.69  N, 4.35  S, 10.55 |
| 2-{4-[(Methylsulfonyl)oxy]phenyl}propanoic acid  **(51)** | C10H12O5S | C, 49.17  H, 4.95  S, 13.13 | C, 49.37  H, 5.28  S, 13.15 |
| 2-{4-[(Isopropylsulfonyl)oxy]phenyl}propanoic acid **(52)** | C12H16O5S | C, 52.93  H, 5.92  S, 11.77 | C, 52.90  H, 5.95  S, 11.68 |
| 2-{4-[(Phenylsulfonyl)oxy]phenyl}propanoic acid  **(53)** | C15H14O5S | C, 58.81  H, 4.61  S, 10.47 | C, 59.05  H, 4.45  S, 10.40 |
| 2-(4-{[(4-Methylphenyl)sulfonyl]oxy}phenyl)propanoic acid **(54)** | C16H16O5S | C, 59.99  H, 5.03  S, 10.01 | C, 59.64  H, 5.23  S, 9.95 |
| 4-{(1*R*)-2-[(Isopropylsulfonyl)amino]-1-methyl-2-oxoethyl}phenyl trifluoromethanesulfonate  **(58)** | C13H16F3NO6S2 | C, 38.71  H, 4.00  N, 3.47  S, 15.90 | C, 38.65  H, 4.30  N, 3.75  S, 15.69 |
| 4-{(1*R*)-1-Methyl-2-oxo-2-[(phenylsulfonyl)amino]ethyl}phenyl trifluoromethanesulfonate  **(59)** | C16H14F3NO6S2 | C, 43.93  H, 3.23  N, 3.20  S, 14.66 | C, 43.90  H, 3.21  N, 3.60  S, 14.36 |
| 4-[(1*R*)-2-{[(2-chlorophenyl)sulfonyl]amino}-1-methyl-2-oxoethyl]phenyl trifluoromethane sulfonate **(60)** | C16H13ClF3NO6S2 | C, 40.73  H, 2.78  N, 2.97  S, 13.59 | C, 41.05  H, 2.70  N, 2.80  S, 13.45 |
| 4-{(1*R*)-1-methyl-2-oxo-2-[(pyridin-3-ylsulfonyl)amino]ethyl}phenyltrifluoromethane sulfonate  **(61)** | C15H13ClF3N2O6S2 | C, 41.10  H, 2.99  N, 6.39  S, 14.63 | C, 41.38  H, 2.75  N, 6.15  S, 14.73 |
| 4-[(1*R*)-1-Methyl-2-oxo-2-{[(trifluoromethyl)sulfonyl]amino}ethyl]phenyl trifluoromethane sulfonate  **(62)** | C11H9F6NO6S2 | C, 30.77  H, 2.11  N, 3.26  S, 14.94 | C, 30.70  H, 2.00  N, 3.65  S, 15.21 |
| 4-[(1*R*)-2-(Hydroxyamino)-1-methyl-2-oxoethyl]phenyl trifluoromethanesulfonate  **(63)** | C10H10F3NO5S | C, 38.34  H, 3.22  N, 4.47  S, 10.24 | C, 38.05  H, 3.20  N, 4.75  S, 10.30 |
| 4-{(1*R*)-2-[Hydroxy(methyl)amino]-1-methyl-2-oxoethyl}phenyl trifluoromethanesulfonate  **(64)** | C11H12F3NO5S | C, 40.37  H, 3.70  N, 4.28  S, 9.80 | C, 40.70  H, 3.55  N, 4.60  S, 9.45 |
| 4-[(1*R*)-2-(Methoxyamino)-1-methyl-2-oxoethyl]phenyl trifluoromethanesulfonate  **(65)** | C13H16F3NO5S | C, 40.37  H, 3.70  N, 4.28  S, 9.80 | C, 40.35  H, 3.75  N, 4.17  S, 9.85 |
| 4-[(1*R*)-2-(Isopropoxyamino)-1-methyl-2-oxoethyl]phenyl trifluoromethanesulfonate  **(66)** | C11H12F3NO5S | C, 43.94  H, 4.54  N, 3.94  S, 9.02 | C, 43.90  H, 4.88  N, 3.69  S, 9.05 |
| 4-[(1*R*)-1-Methyl-2-(methylamino)-2-oxoethyl]phenyl trifluoromethanesulfonate  **(68)** | C11H12F3NO4S | C, 42.44  H, 3.89  N, 4.50  S, 10.30 | C, 42.40  H, 4.15  N, 4.50  S, 10.35 |
| 4-[(1*R*)-2-(Isopropylamino)-1-methyl-2-oxoethyl]phenyl trifluoromethanesulfonate  **(69)** | C13H16F3NO4S | C, 46.01  H, 4.75  N, 4.13  S, 9.45 | C, 46.35  H, 4.60  N, 4.00  S, 9.45 |
| 4-[(1*R*)-2-(Cyclopropylamino)-1-methyl-2-oxoethyl]phenyl trifluoromethanesulfonate  **(70)** | C13H14F3NO4S | C, 46.29  H, 4.18  N, 4.15  S, 9.51 | C, 46.55  H, 4.29  N, 4.40  S, 9.28 |
| 4-{(1*R*)-2-[(Cyclopropylmethyl)amino]-1-methyl-2-oxoethyl}phenyl trifluoromethanesulfonate  **(71)** | C14H16F3NO4S | C, 47.86  H, 4.59  N, 3.99  S, 9.13 | C, 47.95  H, 4.79  N, 4.19  S, 9.25 |
| 4-[(1*R*)-2-(Cyclopentylamino)-1-methyl-2-oxoethyl]phenyl trifluoromethanesulfonate  **(72)** | C15H18F3NO4S | C, 49.31  H, 4.97  N, 3.83  S, 8.78 | C, 49.00  H, 4.69  N, 3.90  S, 8.60 |
| 4-[(1*R*)-2-Anilino-1-methyl-2-oxoethyl]phenyl trifluoromethanesulfonate  **(73)** | C16H14F3NO4S | C, 51.47  H, 3.78  N, 3.75  S, 8.59 | C, 51.09  H, 3.80  N, 3.70  S, 8.90 |
| 4-[(1*R*)-1-Methyl-2-oxo-2-(pyridin-2-ylamino)ethyl]phenyl trifluoromethanesulfonate  **(74)** | C15H13F3N2O4S | C, 48.13  H, 3.50  N, 7.48  S, 8.57 | C, 48.15  H, 3.25  N, 7.80  S, 8.37 |
| 4-[(1*R*)-1-Methyl-2-oxo-2-(pyridin-3-ylamino)ethyl]phenyl trifluoromethanesulfonate  **(75)** | C15H13F3N2O4S | C, 48.13  H, 3.50  N, 7.48  S, 8.57 | C, 48.00  H, 3.28  N, 7.40  S, 8.37 |
| 4-[(1*R*)-1-Methyl-2-oxo-2-(pyridin-4-ylamino)ethyl]phenyl trifluoromethanesulfonate  **(76)** | C15H13F3N2O4S | C, 48.13  H, 3.50  N, 7.48  S, 8.57 | C, 48.50  H, 3.27  N, 7.40  S, 8.88 |
| 4-[(1*R*)-1-Methyl-2-oxo-2-(1,3-thiazol-2-ylamino)ethyl]phenyl trifluoromethanesulfonate  **(77)** | C13H11F3N2O4S2 | C, 41.05  H, 2.91  N, 7.36  S, 16.86 | C, 41.35  H, 2.95  N, 7.70  S, 16.60 |
| 4-[(1*R*)-1-Methyl-2-(1,3-oxazol-2-ylamino)-2-oxoethyl]phenyl trifluoromethanesulfonate  **(78)** | C13H11F3N2O5S2 | C, 42.86  H, 3.04  N, 7.69  S, 8.80 | C, 43.10  H, 3.35  N, 7.30  S, 8.89 |
| 4-[(1*R*)-1-methyl-2-oxo-2-{[4-(trifluoromethyl)-1,3-thiazol-2-yl]amino}ethyl]phenyl trifluoromethanesulfonate  **(79)** | C14H10F6N2O4S2 | C, 37.50  H, 2.25  N, 6.25  S, 14.30 | C, 37.21  H, 2.50  N, 6.00  S, 13.95 |

13C-NMR data for representative compounds

**N-[(*R*)-2-(4-Isobutylphenyl)propionyl]methanesulfonamide (reparixin)**

13C-NMR (DMSO-d6)  (ppm) 174.01, 140.29, 137.84, 129.45, 127.49, 45.18, 44.57, 29.92, 22.54, 18.57.

**(*R*)-2-(3-Benzoylphenyl)propionic acid ((*R*)-ketoprofen) (21)**

13C-NMR (DMSO-d6)  (ppm) 195.63, 175.06, 141.77, 137.07, 136.98, 131.82, 129.69, 128.57, 128.40, 44.43, 18.47.

**(*R*)-2-(4-trifluoromethanesulfonyloxyphenyl)propionic acid (56)**

13C-NMR (DMSO-d6)  (ppm) 174.83, 150.39, 142.20, 129.79, 121.37, 120.36, 116.10, 43.99, 18.36.

**(*R*)-2-(4-trifluoromethanesulfonyloxyphenyl)-N-methanesulfonylpropionamide (57)**

13C-NMR (DMSO-d6)  (ppm) 173.35, 148.57, 141.42, 130.18, 121.92, 44.98, 18.55.

**(*R*)-2-(4-trifluoromethanesulfonyloxyphenyl)propionamide (67)**

13C-NMR (CDCl3) 166.5, 150.6, 129.4, 121.7, 119.6, 45.9, 18.7.
